# Supplementary material for: Two octacyanometallate-based Ni(ii)W(v) bimetallic assemblies with metamagnetism
Source: Royal Society of Chemistry journal article supplement (doi:10.1039/c0dt01773f), 2011-01-01
Supplement: c0dt01773f.pdf [file c0dt01773f.pdf]

## Supporting Information for

### **Two octacyanometallate-based Ni(II)W(V) bimetallic assemblies with metamagnetism**

**Ai-Hua Yuan,<sup>\*a</sup> Su-Yan Qian,<sup>a</sup> Wen-Yan Liu,<sup>a</sup> Hu Zhou<sup>a</sup> and You Song<sup>\*b</sup>**

*<sup>a</sup>School of Material Science and Engineering, Jiangsu University of Science and Technology, Zhenjiang 212003, China. E-mail: aihuayuan@163.com*

*<sup>b</sup>State Key Laboratory of Coordination Chemistry, Nanjing National Laboratory of Microstructures, School of Chemistry and Chemical Engineering, Nanjing University, Nanjing 210093, China. E-mail: yousong@nju.edu.cn*

**Table S1** Selected bond distances (Å) and angles (°) for **1**.

|          |          |           |          |
|----------|----------|-----------|----------|
| W1-C1    | 2.170(5) | Ni2-N1    | 2.139(5) |
| W1-C2    | 2.171(5) | Ni2-N11   | 2.097(5) |
| W1-C3    | 2.172(5) | Ni2-N12   | 2.077(5) |
| W1-C4    | 2.199(6) | C1-N1     | 1.143(7) |
| W1-C5    | 2.160(5) | C2-N2     | 1.137(7) |
| W1-C6    | 2.127(6) | C3-N3     | 1.135(7) |
| W1-C7    | 2.186(5) | C4-N4     | 1.112(7) |
| W1-C8    | 2.170(5) | C5-N5     | 1.138(7) |
| Ni1-N6   | 2.113(5) | C6-N6     | 1.163(7) |
| Ni1-N9   | 2.105(5) | C7-N7     | 1.114(7) |
| Ni1-N10  | 2.078(5) | C8-N8     | 1.116(7) |
| W1-C1-N1 | 174.3(5) | W1-C6-N6  | 175.4(5) |
| W1-C2-N2 | 175.6(6) | W1-C7-N7  | 179.7(5) |
| W1-C3-N3 | 178.3(5) | W1-C8-N8  | 177.6(6) |
| W1-C4-N4 | 177.8(5) | Ni1-N6-C6 | 160.5(5) |
| W1-C5-N5 | 175.9(5) | Ni2-N1-C1 | 156.8(4) |

**Table S2** Selected bond distances (Å) and angles (°) for **2**.

|                       |          |           |          |
|-----------------------|----------|-----------|----------|
| W1-C1                 | 2.167(6) | Ni1-N14   | 2.083(6) |
| W1-C2                 | 2.163(6) | Ni2-N2    | 2.126(5) |
| W1-C3                 | 2.162(6) | Ni2-N16   | 2.065(5) |
| W1-C4                 | 2.117(7) | Ni2-N17   | 2.080(5) |
| W1-C5                 | 2.176(5) | C1-N1     | 1.169(7) |
| W1-C6                 | 2.165(6) | C2-N2     | 1.138(7) |
| W1-C7                 | 2.123(6) | C3-N3     | 1.159(7) |
| W1-C8                 | 2.159(6) | C4-N4     | 1.164(8) |
| Ni1-N1                | 2.109(4) | C5-N5     | 1.139(7) |
| Ni1-N5 <sup>iii</sup> | 2.095(5) | C6-N6     | 1.163(8) |
| Ni1-N10               | 2.053(5) | C7-N7     | 1.165(7) |
| Ni1-N11               | 2.065(5) | C8-N8     | 1.136(8) |
| Ni1-N13               | 2.062(5) |           |          |
| W1-C1-N1              | 173.8(5) | W1-C6-N6  | 178.7(5) |
| W1-C2-N2              | 177.0(5) | W1-C7-N7  | 177.0(5) |
| W1-C3-N3              | 176.7(5) | W1-C8-N8  | 179.0(6) |
| W1-C4-N4              | 177.6(6) | Ni1-N1-C1 | 161.2(5) |
| W1-C5-N5              | 178.7(5) | Ni2-N2-C2 | 160.7(5) |

Symmetry code: (iii)  $x - 1/2; 1/2 - y; z - 1/2$ .

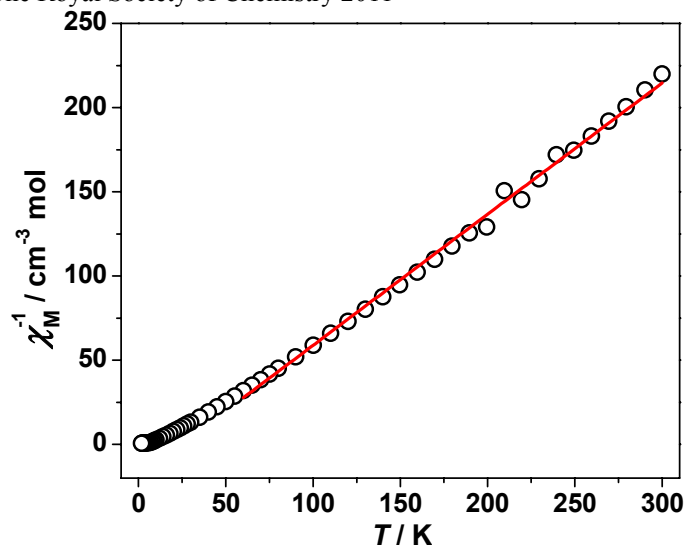

**Fig. S1** Temperature dependence of  $1/\chi_M$  for **1** measured at 2 kOe. The solid line represents the fit obtained by the Curie-Weiss law.

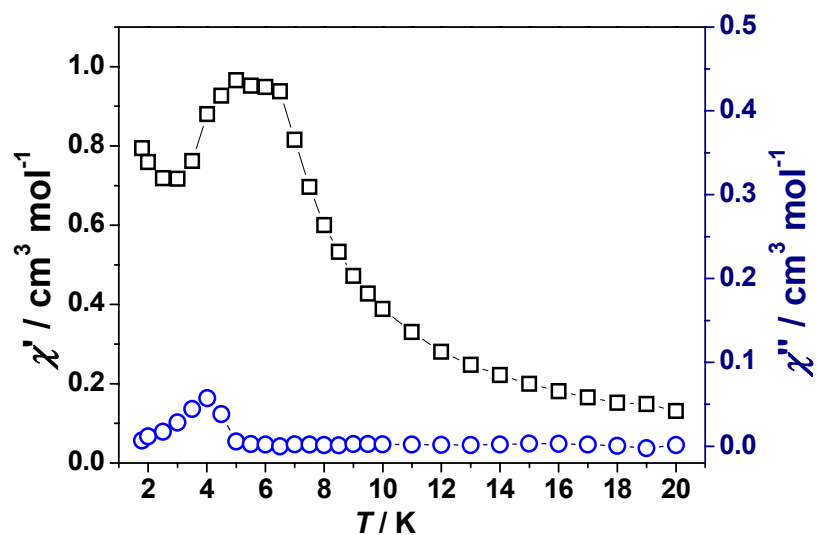

**Fig. S2** Temperature dependence of in-phase  $\chi'$  ( $\square$ ), and out-of-phase  $\chi''$  ( $\circ$ ), components of the *ac* susceptibility at 10 Hz frequency for **1**.

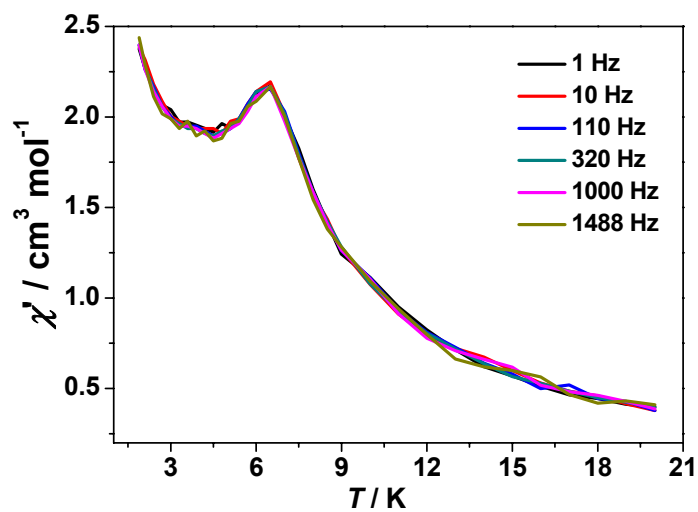

**Fig. S3** Plots of  $\chi'$  versus  $T$  of **1** at an ac field of 3 Oe, zero dc field.

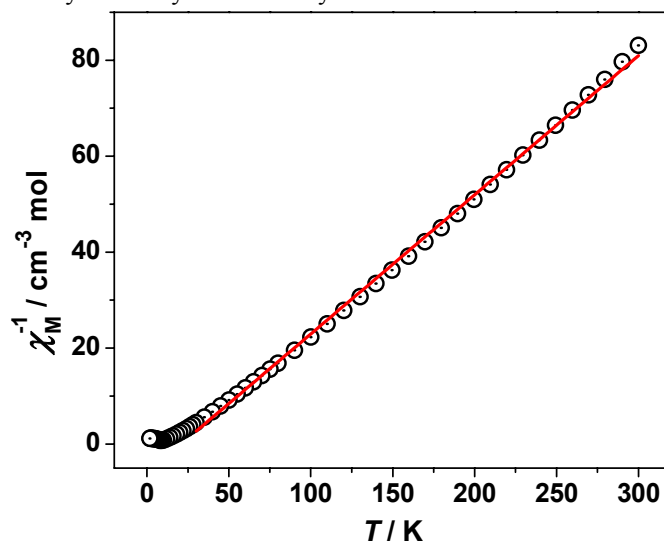

**Fig. S4** Temperature dependence of  $1/\chi_M$  for **2** measured at 2 kOe. The solid line represents the fit obtained by the Curie-Weiss law.

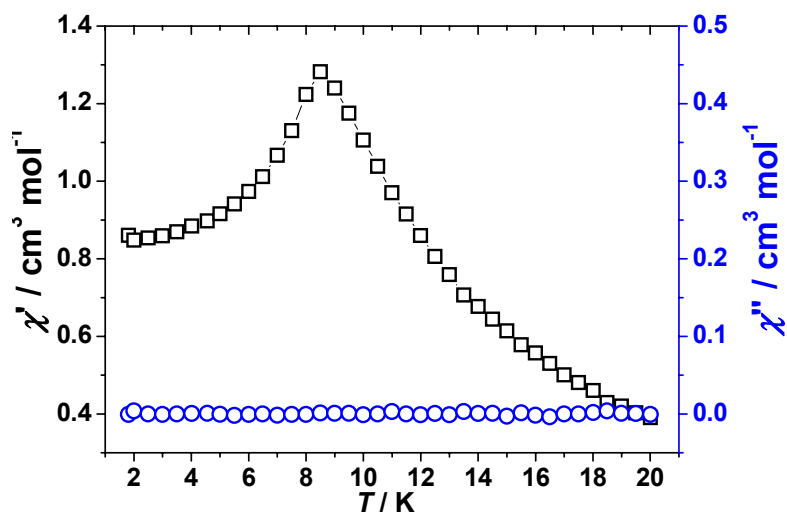

**Fig. S5** Temperature dependence of in-phase  $\chi'$  ( $\square$ ), and out-of-phase  $\chi''$  ( $\circ$ ), components of the *ac* susceptibility at 10 Hz frequency for **2**.
